# Supplementary material
Source: PubMed Central journal article supplement (PMC7453688)
Supplement: NIHMS1616864-supplement-supplemental_figure.pdf [file NIHMS1616864-supplement-supplemental_figure.pdf]

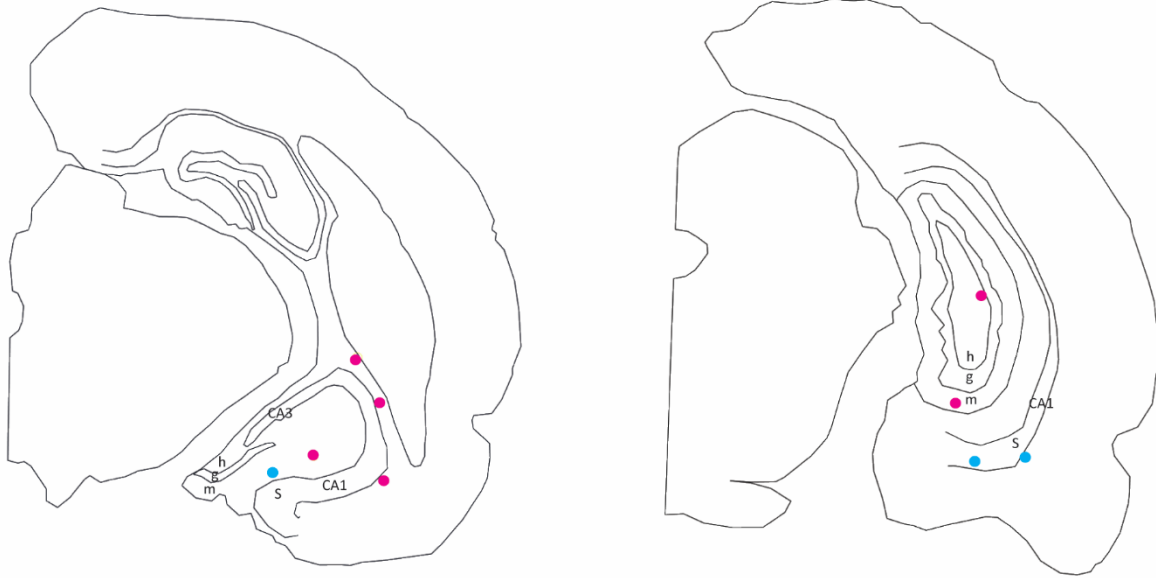

Supplemental Figure

Schematic of electrode sites that recorded the most seizure onsets in ventral hippocampal (magenta) and ventral subiculum (cyan) regions with the highest z-scores (Table 1). h = hilus, g = granule cell layer, m = molecular layer, S = subiculum.
